# Supplementary material for: The use of composite time trade-off and discrete choice experiment methods for the valuation of the Short Warwick-Edinburgh Mental Well-being Scale (SWEMWBS): a think-aloud study
Source: Springer Nature journal article supplement (doi:10.1007/s11136-022-03123-0), 2022-03-24
Supplement: MOESM1 [file 20248784]

## Supplementary Information – ESM\_1

**Article title:** The use of composite time trade-off and discrete choice experiment methods for the valuation of the Short Warwick-Edinburgh Mental Wellbeing Scale (SWEMWBS): A think-aloud study

**Journal name:** Quality of Life Research

**Author names:** Hei Hang Edmund Yiu<sup>1</sup>, Hareth Al-Janabi<sup>2</sup>, Sarah Stewart-Brown<sup>3</sup>, Stavros Petrou<sup>4</sup>, Jason Madan<sup>5</sup>

<sup>1,5</sup> Clinical Trials Unit, Warwick Medical School, University of Warwick, Coventry, United Kingdom

<sup>2</sup> Institute of Applied Health Research, College of Medical and Dental Sciences, University of Birmingham, Edgbaston, Birmingham, United Kingdom

<sup>3</sup> Division of Health Sciences, Warwick Medical School, University of Warwick, Coventry, United Kingdom

<sup>4</sup> Nuffield Department of Primary Care Health Sciences, University of Oxford, Woodstock Road, Oxford, United Kingdom

**Corresponding author:** Hei Hang Edmund Yiu, Clinical Trials Unit, Warwick Medical School, University of Warwick, Coventry, United Kingdom

**E-mail address of the corresponding author:** [H.Yiu@warwick.ac.uk](mailto:H.Yiu@warwick.ac.uk)

**Fig. 1** The SWEMWBS descriptive system

**Below are some statements about feelings and thoughts.  
Please tick the box that best describes your experience of  
each over the last 2 weeks**

| STATEMENTS                                         | None of the time | Rarely | Some of the time | Often | All of the time |
|----------------------------------------------------|------------------|--------|------------------|-------|-----------------|
| I've been feeling optimistic about the future      | 1                | 2      | 3                | 4     | 5               |
| I've been feeling useful                           | 1                | 2      | 3                | 4     | 5               |
| I've been feeling relaxed                          | 1                | 2      | 3                | 4     | 5               |
| I've been dealing with problems well               | 1                | 2      | 3                | 4     | 5               |
| I've been thinking clearly                         | 1                | 2      | 3                | 4     | 5               |
| I've been feeling close to other people            | 1                | 2      | 3                | 4     | 5               |
| I've been able to make up my own mind about things | 1                | 2      | 3                | 4     | 5               |
